# Supplementary material for: Sulphadoxine-pyrimethamine plus azithromycin for the prevention of low birthweight in Papua New Guinea: a randomised controlled trial
Source: Springer Nature journal article supplement (doi:10.1186/s12916-014-0258-3), 2015-01-15

# MADANG DISTRICT HEALTH FACILITIES

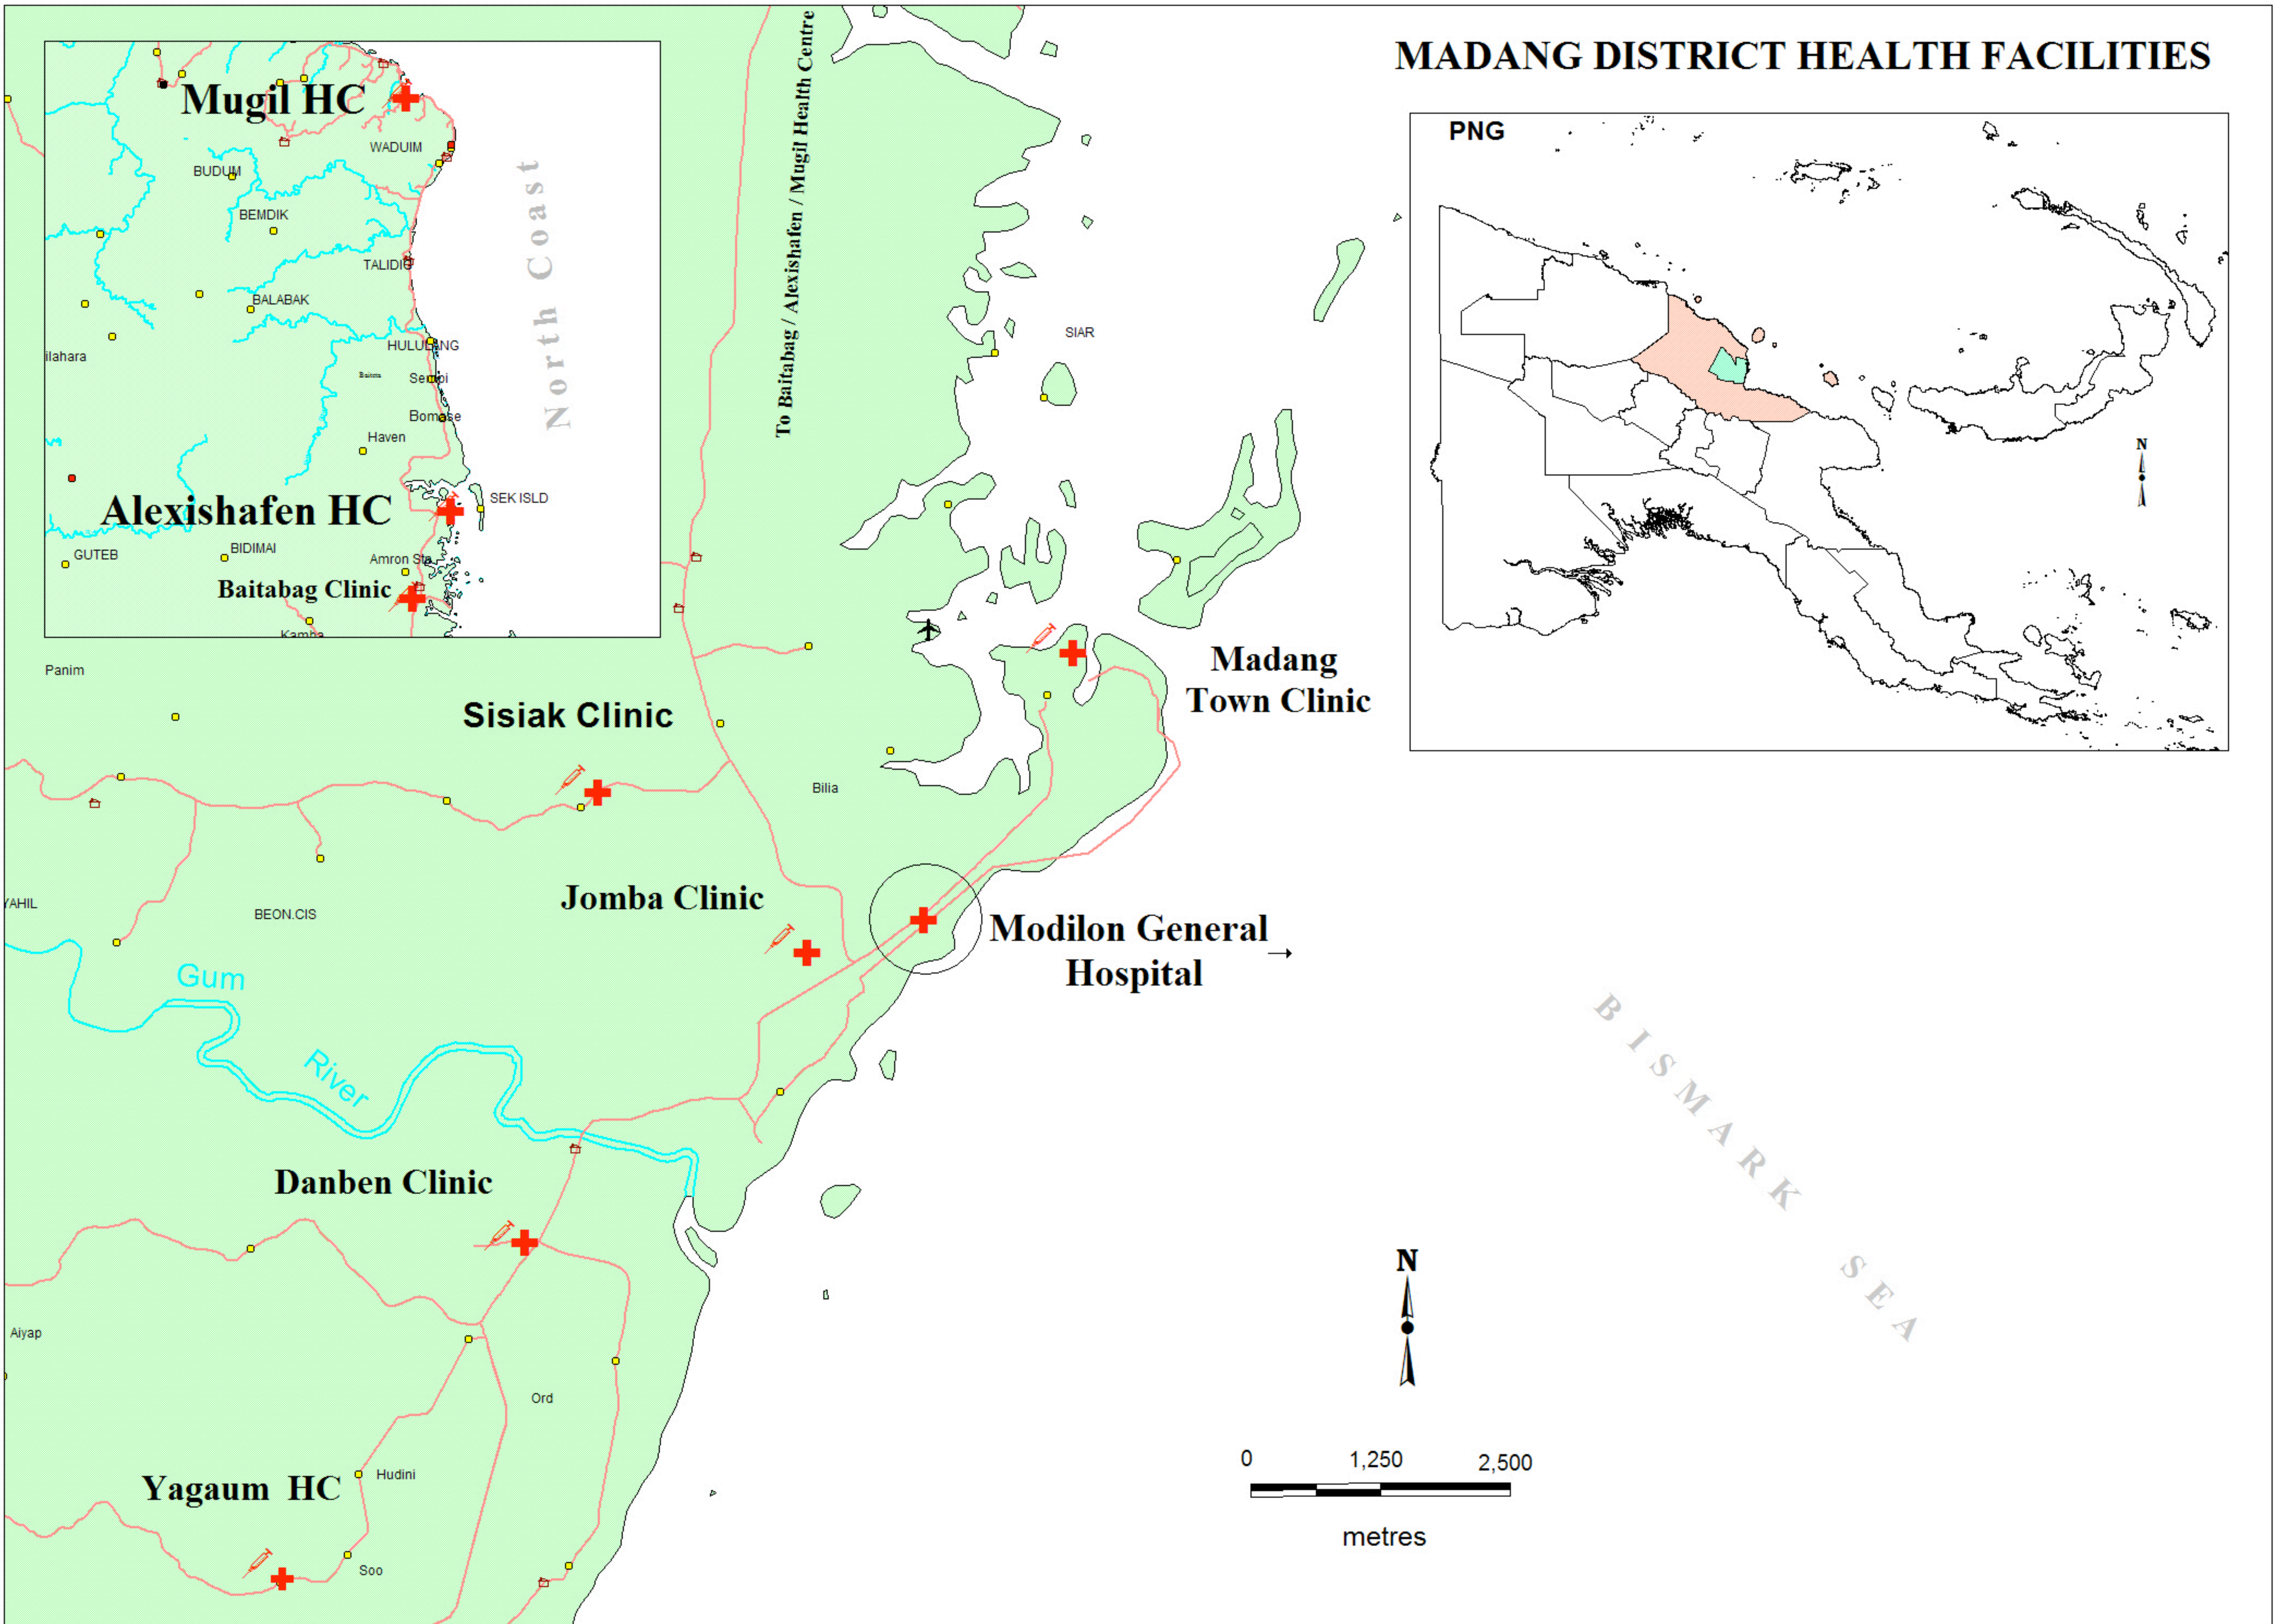

Supplement: MOESM3 [file 9758666]
